# Supplementary material
Source: PubMed Central journal article supplement (PMC5195898)

Fig. 2b

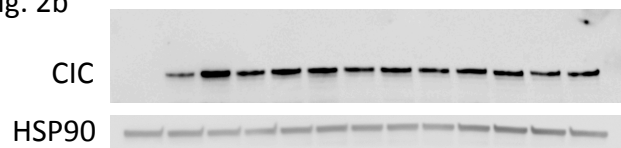

Fig. 3e

250 →

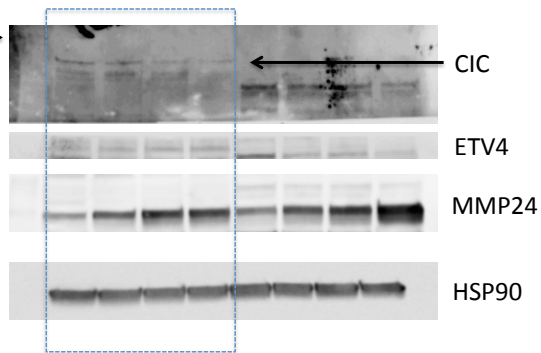

Fig. 3h

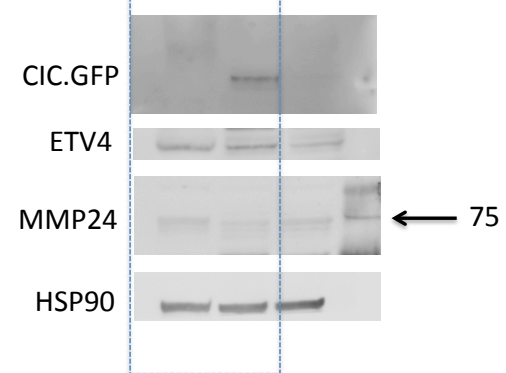

Figure 5e

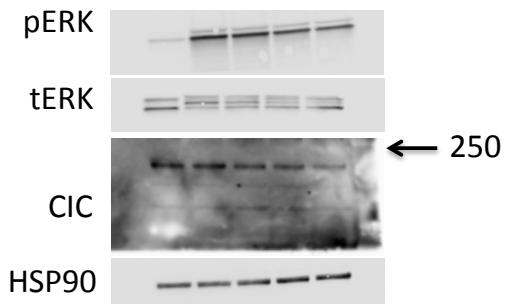

Figure 5f

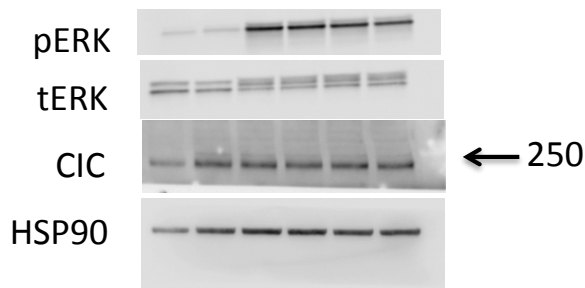

Figure 5g

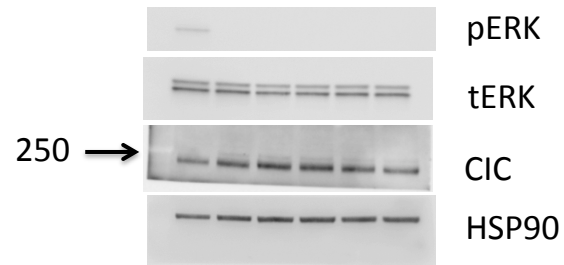

Figure 5i

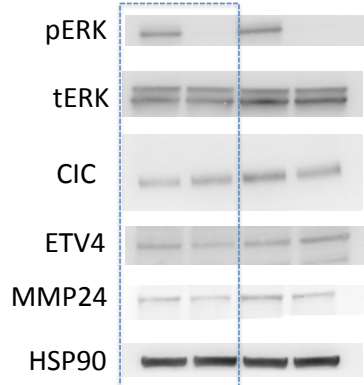

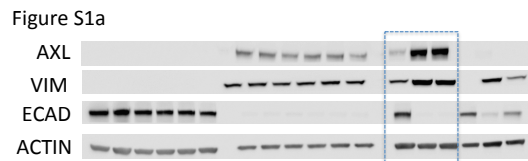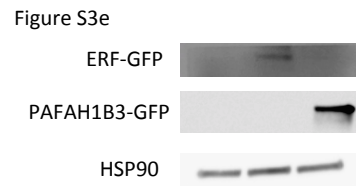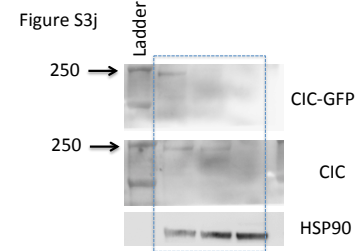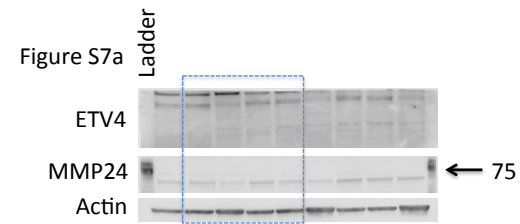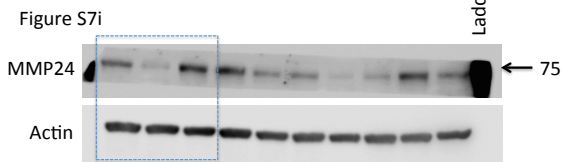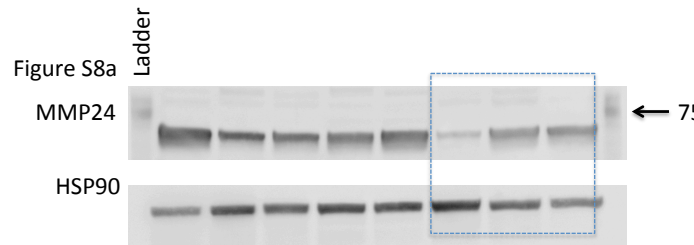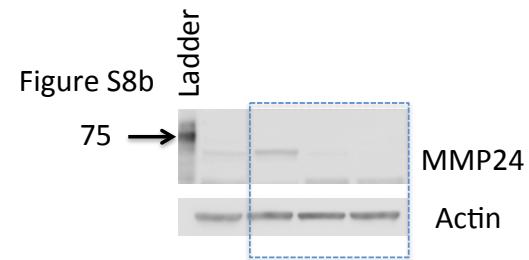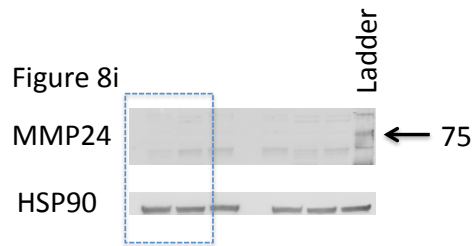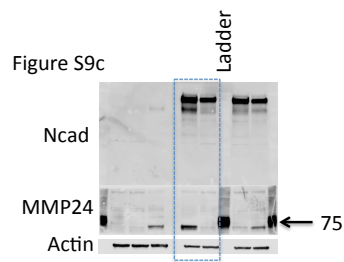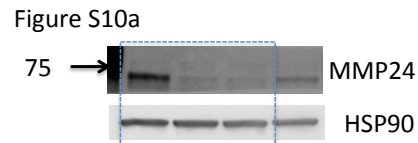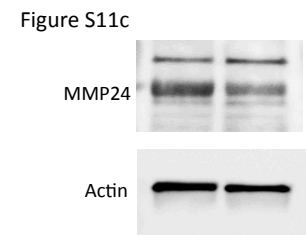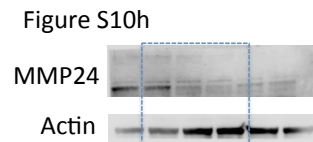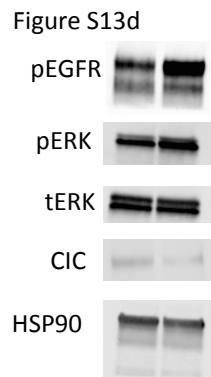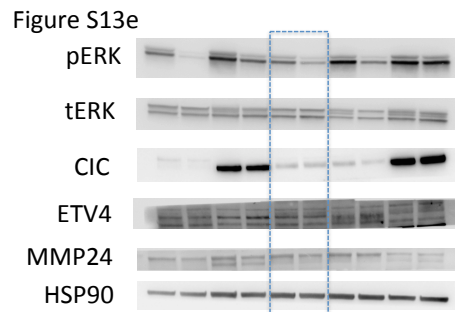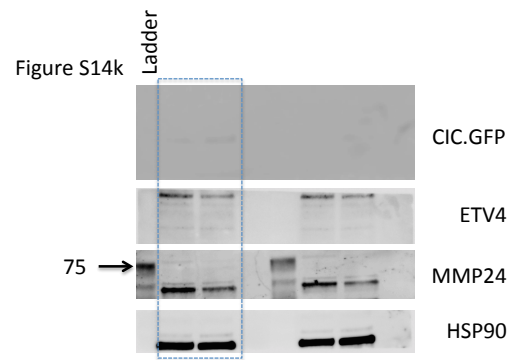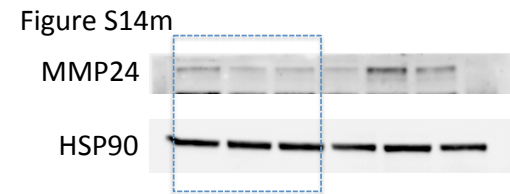

Supplementary figure 4a

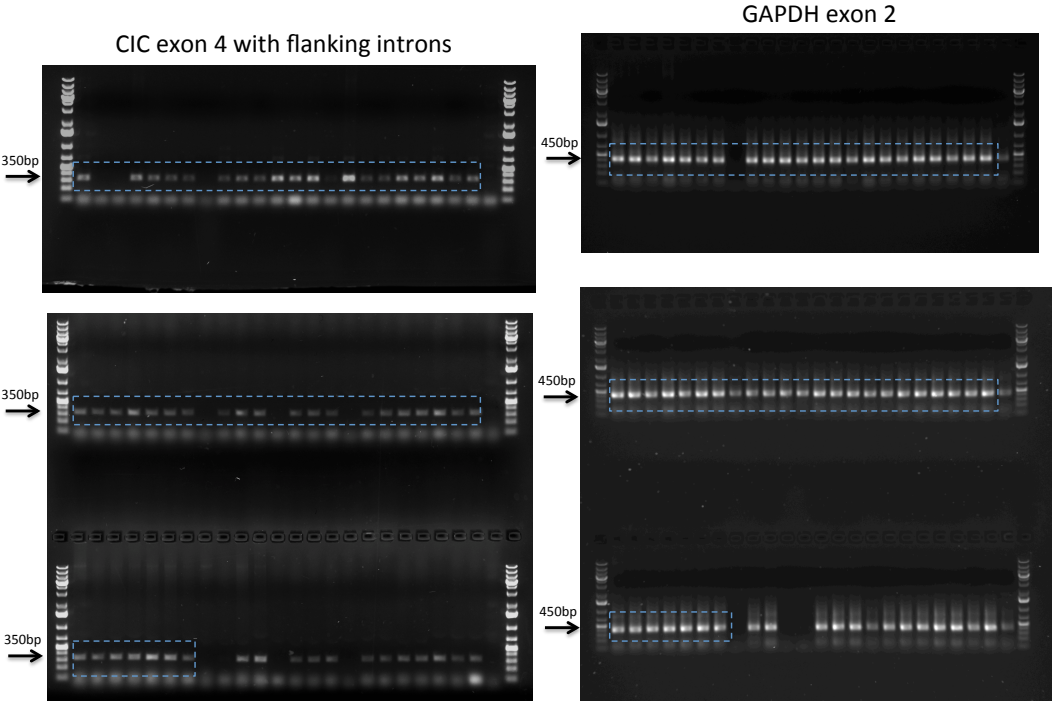

Supplement: NIHMS825571-supplement-2.pdf [file NIHMS825571-supplement-2.pdf]
